# Supplementary material for: A novel characteristic of salicylate UV absorbers: suppression of diethylhexyl 2,6-naphthalate (Corapan TQ)-photosensitized singlet oxygen generation
Source: Royal Society of Chemistry journal article supplement (doi:10.1039/c9pp00104b), 2019-04-16
Supplement: c9pp00104b1.pdf [file c9pp00104b1.pdf]

## Electronic Supplementary Information

### A novel characteristic of salicylate UV absorbers: suppression of diethylhexyl 2,6-naphthalate (Corapan TQ)-photosensitized singlet oxygen generation

Shirabe Fukuchi <sup>a</sup>, Mikio Yagi <sup>a\*</sup>, Nozomi Oguchi-Fujiyama <sup>b</sup>, Jasmin Kang <sup>b</sup>, Azusa Kikuchi <sup>a\*</sup>

<sup>a</sup> Department of Chemistry, Graduate School of Engineering Science, Yokohama National University, Tokiwadai, Hodogaya-ku, Yokohama 240-8501, Japan.

<sup>b</sup> Shiseido Global Innovation Center, Hayabuchi, Tsuzuki-ku, Yokohama 224-8558, Japan.

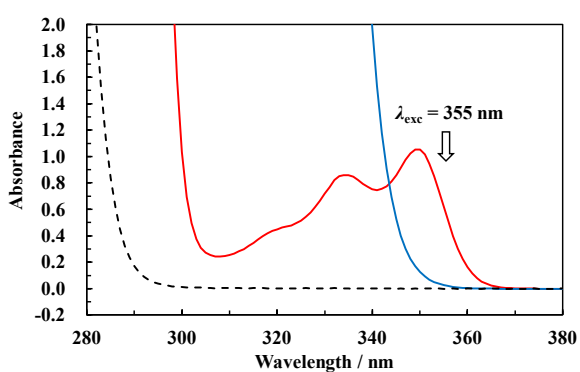

**Fig. S1** UV absorption spectra of (a) DEHN (0.4 mmol dm<sup>-3</sup>, red), (b) HMS (32 mmol dm<sup>-3</sup>, blue) and (c) 3-EtAA (32 mmol dm<sup>-3</sup>, broken line) in ethanol at 25 °C.

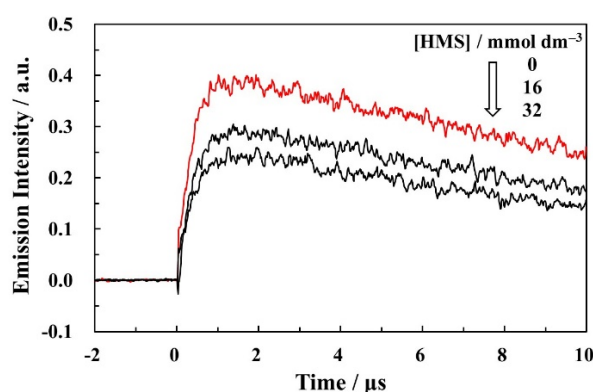

**Fig. S2** Kinetic traces of the phosphorescence intensity of singlet oxygen taken following 355 nm laser excitation of DEHN (0.4 mmol dm<sup>-3</sup>) in air-saturated ethanol at 25 °C in the absence (red) and presence of HMS. The phosphorescence intensity was monitored at 1274 nm.

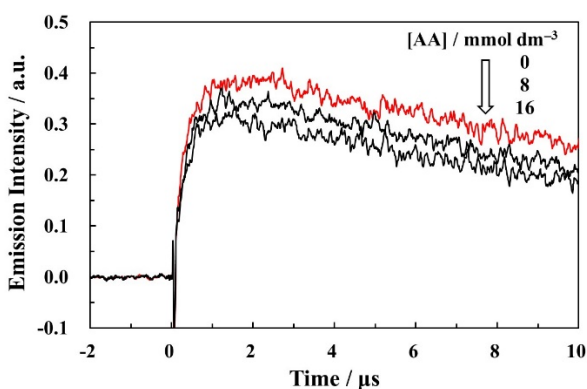

**Fig. S3** Kinetic traces of the phosphorescence intensity of singlet oxygen taken following 355 nm laser excitation of DEHN (0.4 mmol dm<sup>-3</sup>) in air-saturated ethanol at 25 °C in the absence (red) and presence of AA. The phosphorescence intensity was monitored at 1274 nm.

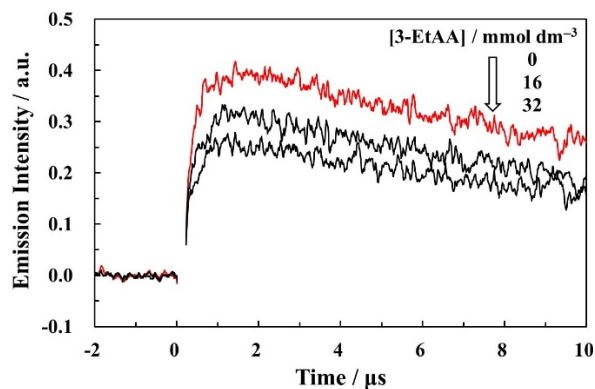

**Fig. S4** Kinetic traces of the phosphorescence intensity of singlet oxygen taken following 355 nm laser excitation of DEHN (0.4 mmol dm<sup>-3</sup>) in air-saturated ethanol at 25 °C in the absence (red) and presence of 3-EtAA. The phosphorescence intensity was monitored at 1274 nm.

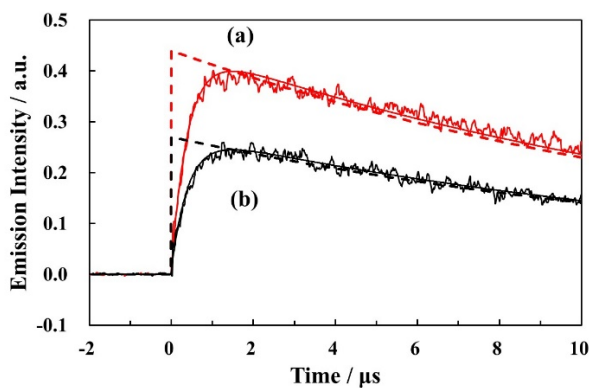

**Fig. S5** Kinetic traces of the phosphorescence intensity of singlet oxygen generated by excitation of DEHN ( $0.4 \text{ mmol dm}^{-3}$ ) (a) in the absence (red) and (b) presence of HMS ( $32 \text{ mmol dm}^{-3}$ ) in air-saturated ethanol at  $25 \text{ }^\circ\text{C}$ . Computer-simulated kinetic traces obtained with (a)  $c = 1.0$ ,  $\Phi_{\Delta} = 0.44$ ,  $\tau_{\Delta} = 15.4 \text{ } \mu\text{s}$ ,  $\tau_{\text{T}} = 0.001 \text{ } \mu\text{s}$  (broken line) and  $\tau_{\text{T}} = 0.40 \text{ } \mu\text{s}$  (solid line), and (b)  $c = 1.0$ ,  $\Phi_{\Delta} = 0.27$ ,  $\tau_{\Delta} = 15.4 \text{ } \mu\text{s}$ ,  $\tau_{\text{T}} = 0.001 \text{ } \mu\text{s}$  (broken line) and  $\tau_{\text{T}} = 0.40 \text{ } \mu\text{s}$  (solid line).

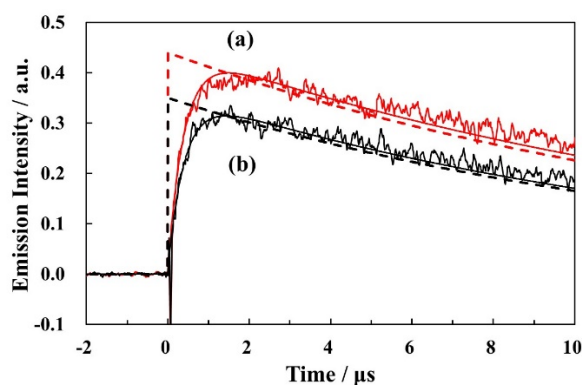

**Fig. S6** Kinetic traces of the phosphorescence intensity of singlet oxygen generated by excitation of DEHN ( $0.4 \text{ mmol dm}^{-3}$ ) (a) in the absence (red) and (b) presence of AA ( $16 \text{ mmol dm}^{-3}$ ) in air-saturated ethanol at  $25 \text{ }^\circ\text{C}$ . Computer-simulated kinetic traces obtained with (a)  $c = 1.0$ ,  $\Phi_{\Delta} = 0.44$ ,  $\tau_{\Delta} = 15.4 \text{ } \mu\text{s}$ ,  $\tau_{\text{T}} = 0.001 \text{ } \mu\text{s}$  (broken line) and  $\tau_{\text{T}} = 0.40 \text{ } \mu\text{s}$  (solid line), and (b)  $c = 1.0$ ,  $\Phi_{\Delta} = 0.35$ ,  $\tau_{\Delta} = 13.3 \text{ } \mu\text{s}$ ,  $\tau_{\text{T}} = 0.001 \text{ } \mu\text{s}$  (broken line) and  $\tau_{\text{T}} = 0.40 \text{ } \mu\text{s}$  (solid line).

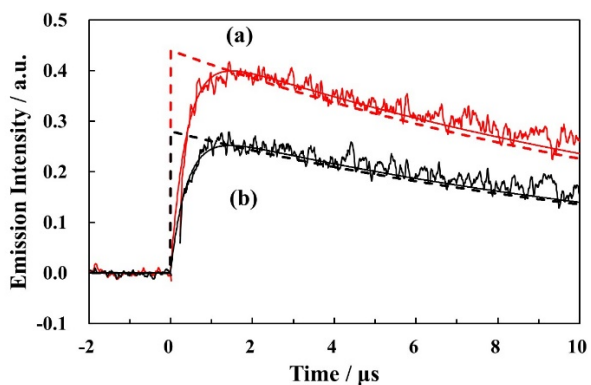

**Fig. S7** Kinetic traces of the phosphorescence intensity of singlet oxygen generated by excitation of DEHN ( $0.4 \text{ mmol dm}^{-3}$ ) (a) in the absence (red) and (b) presence of 3-EtAA ( $32 \text{ mmol dm}^{-3}$ ) in air-saturated ethanol at  $25 \text{ }^\circ\text{C}$ . Computer-simulated kinetic traces obtained with (a)  $c = 1.0$ ,  $\Phi_{\Delta} = 0.44$ ,  $\tau_{\Delta} = 15.4 \text{ } \mu\text{s}$ ,  $\tau_{\text{T}} = 0.001 \text{ } \mu\text{s}$  (broken line) and  $\tau_{\text{T}} = 0.40 \text{ } \mu\text{s}$  (solid line), and (b)  $c = 1.0$ ,  $\Phi_{\Delta} = 0.28$ ,  $\tau_{\Delta} = 13.8 \text{ } \mu\text{s}$ ,  $\tau_{\text{T}} = 0.001 \text{ } \mu\text{s}$  (broken line) and  $\tau_{\text{T}} = 0.40 \text{ } \mu\text{s}$  (solid line).

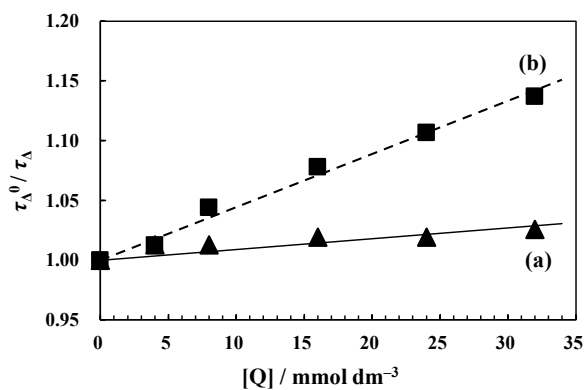

**Fig. S8** Stern-Volmer plots according to Eq. (3) for the quenching of singlet oxygen by (a) HMS and (b) 3-EtAA in ethanol at  $25 \text{ }^\circ\text{C}$ .

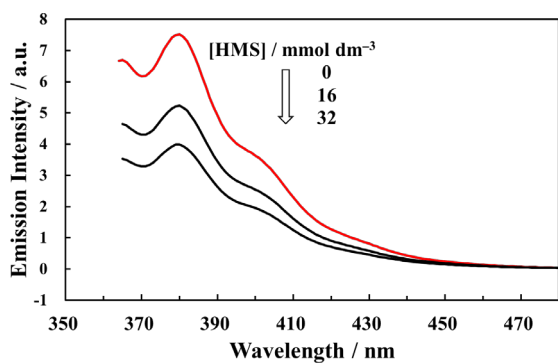

**Fig. S9** Fluorescence ( $\lambda_{\text{ex}} = 355 \text{ nm}$ ) spectra of DEHN in the absence (red) and presence of HMS in air-saturated ethanol at  $25 \text{ }^\circ\text{C}$ .

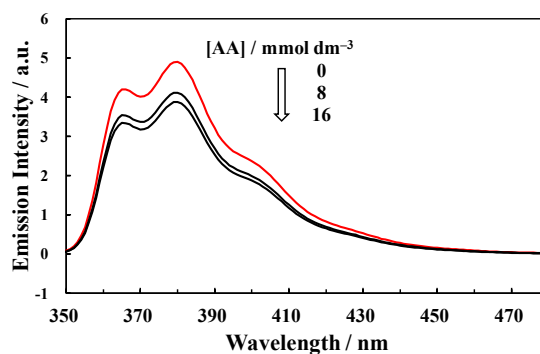

**Fig. S10** Fluorescence ( $\lambda_{\text{ex}} = 334 \text{ nm}$ ) spectra of DEHN in the absence (red) and presence of AA in air-saturated ethanol at  $25 \text{ }^\circ\text{C}$ .

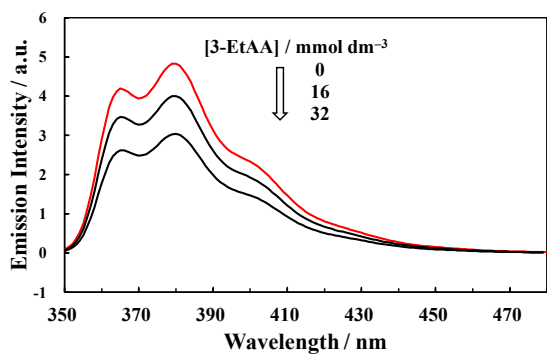

**Fig. S11** Fluorescence ( $\lambda_{\text{ex}} = 334 \text{ nm}$ ) spectra of DEHN in the absence (red) and presence of 3-EtAA in air-saturated ethanol at 25 °C.

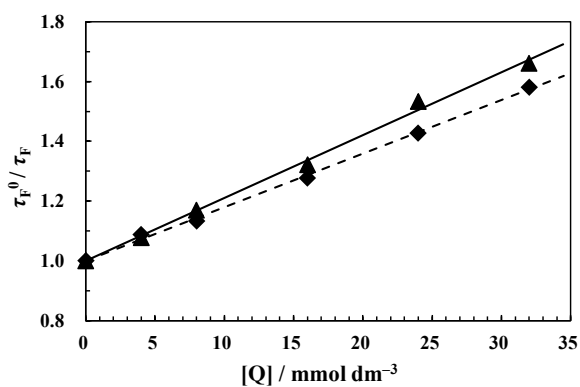

**Fig. S12** Stern–Volmer plots according to Eq. (5) for the quenching of the S<sub>1</sub> state of DEHN by HMS (solid line) and 3-EtAA (broken line) in air-saturated ethanol at 25 °C. Emissions were monitored at 380 nm.

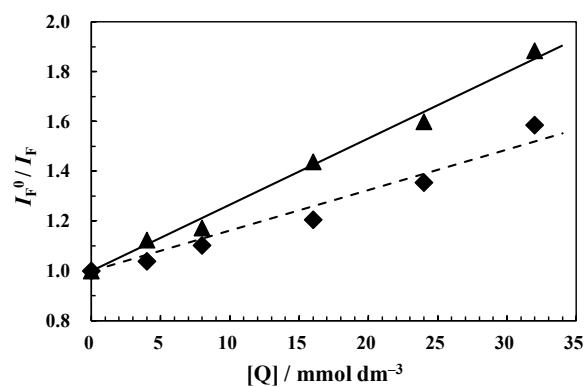

**Fig. S13** Stern–Volmer plots according to Eq. (6) for the quenching of the S<sub>1</sub> state of DEHN by HMS (solid line) and 3-EtAA (broken line) in air-saturated ethanol at 25 °C. Emissions were monitored at 380 nm.

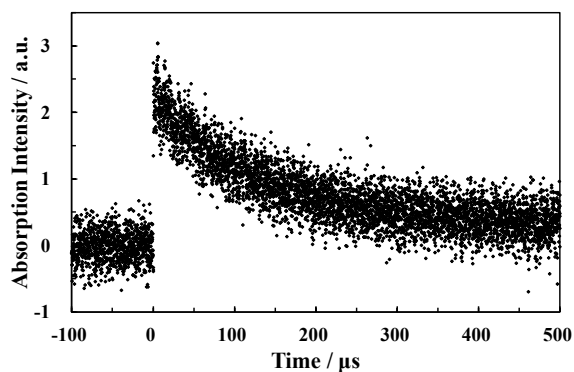

**Fig. S14** Kinetic trace of the transient absorption following 355 nm laser excitation of DEHN (4.1 mmol dm<sup>-3</sup>) in degassed ethanol at 25 °C. The transient absorption was monitored at 510 nm.
